# Supplementary material for: Porous palladium coated conducting polymer nanoparticles for ultrasensitive hydrogen sensors
Source: Royal Society of Chemistry journal article supplement (doi:10.1039/c5nr06193h), 2015-01-01
Supplement: c5nr06193h1.pdf [file c5nr06193h1.pdf]

Electronic Supplementary Information (ESI) for

## **Porous Palladium Coated Conducting Polymer Nanoparticles for Ultrasensitive Hydrogen Sensors**

**Jun Seop Lee<sup>a,b</sup>, Sung Gun Kim<sup>a</sup>, Sunghun Cho<sup>a,c</sup> and Jyongsik Jang<sup>a\*</sup>**

<sup>a</sup> School of Chemical and Biological Engineering, College of Engineering, Seoul National University (SNU),  
599 Gwanangno, Gwanak-gu, Seoul, 151-742 (Korea).

Fax: +82-2-888-7295; Tel: 82-2-880-8348; e-mail: jsjang@plaza.snu.ac.kr

<sup>b</sup> Materials Science and Engineering Program and Texas Materials Institute, The University of Texas at  
Austin, Austin, TX 78712 (USA)

<sup>c</sup> Department of Chemistry and Biochemistry and the California NanoSystems Institute, University of  
California, Los Angeles, Los Angeles, CA 90095 (USA)

# 1. BET surface area and BJH pore distribution of palladium architectures without CPPyNPs

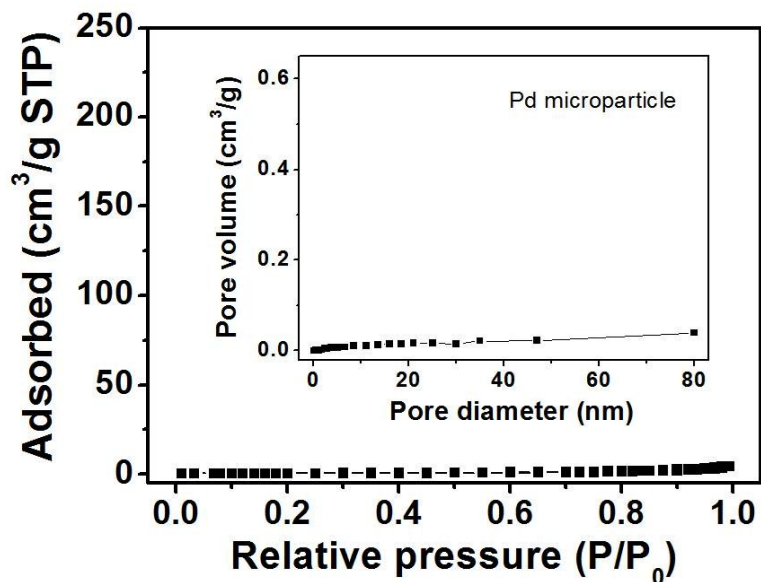

**Figure S1.** Nitrogen adsorption-desorption isotherm and pore size distribution curves (inset) of palladium architectures without CPPyNPs.

## 2. Hydrogen sensing ability of palladium architectures without CPPyNPs

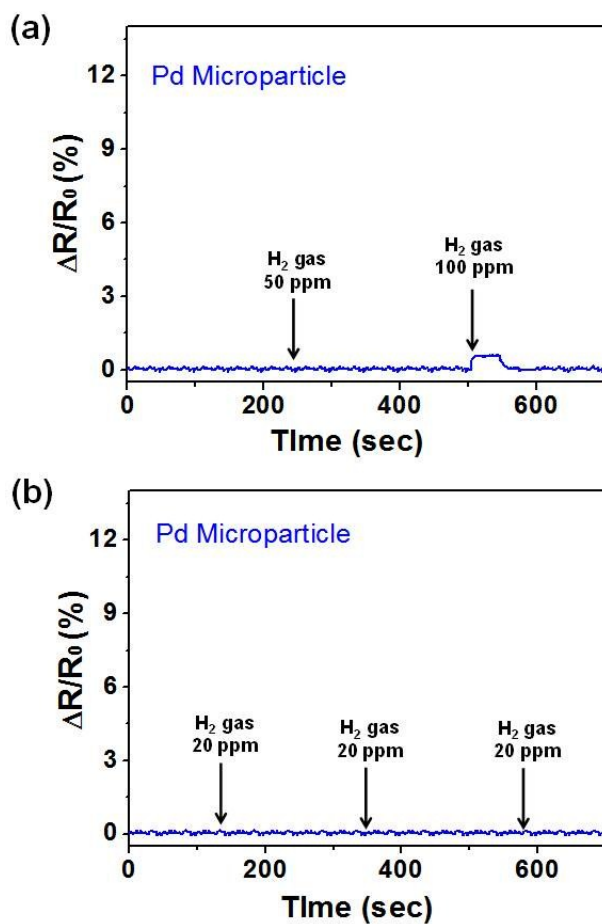

**Figure S2.** Normalized resistance changes upon (a) sequential exposure to various concentrations of hydrogen and (b) periodic exposure to 20 ppm of hydrogen gas of the palladium architectures without CPPyNPs.

### 3. HR-TEM image of Pd@CPPy\_C16 after 100 cycle exposure of H<sub>2</sub>

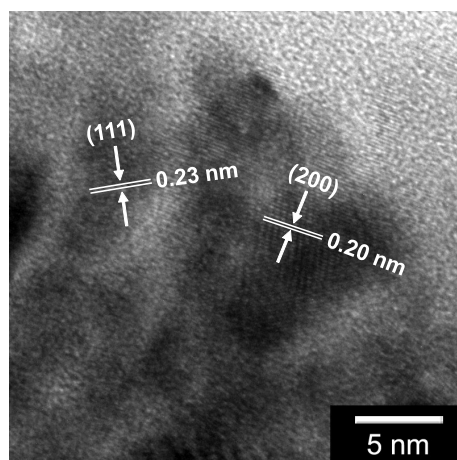

**Figure S3.** HR-TEM image of Pd@CPPy\_C16 after 100 cycle exposure of H<sub>2</sub> gas sensing.
